# Supplementary material
Source: PubMed Central journal article supplement (PMC2790319)

Figure S1

A

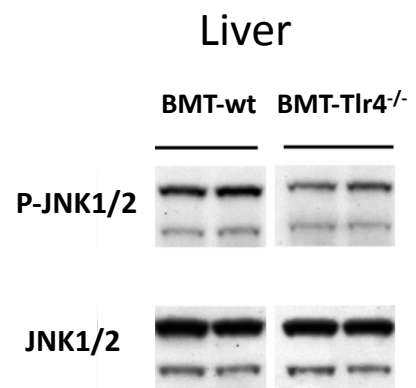

B

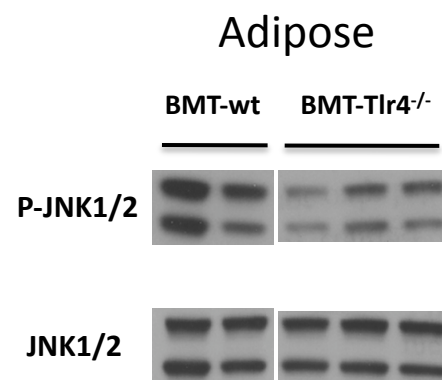

Figure S2

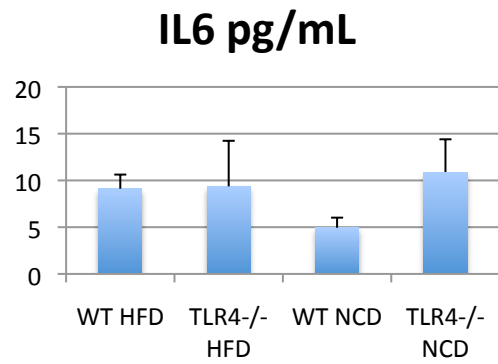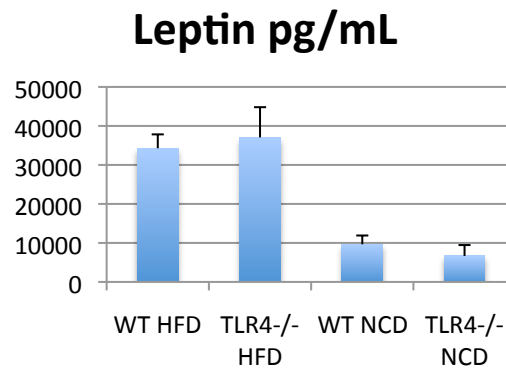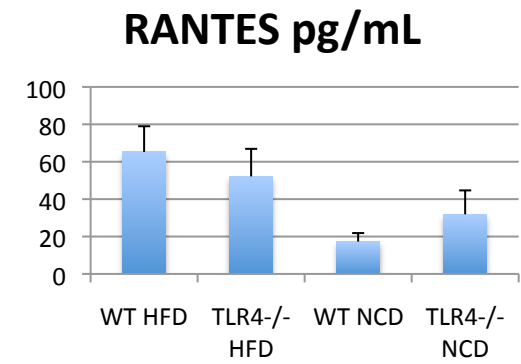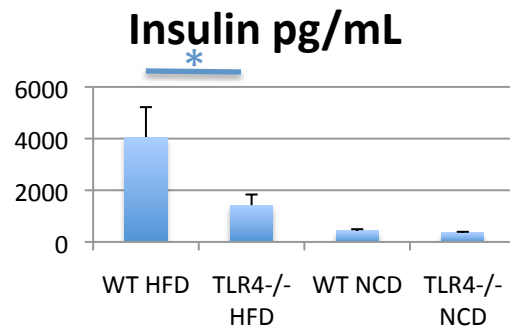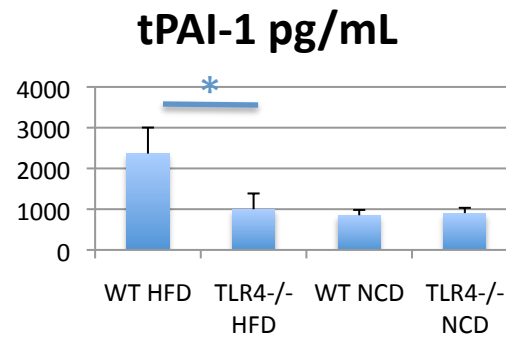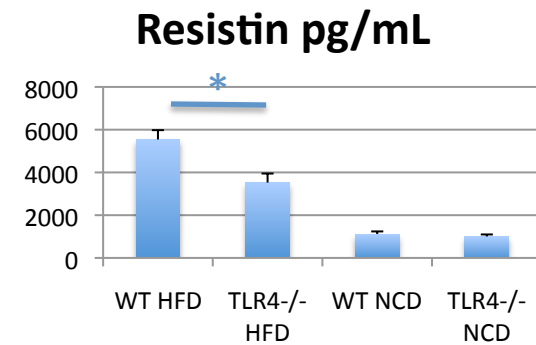

Figure S3

### Adipocyte number per field of view

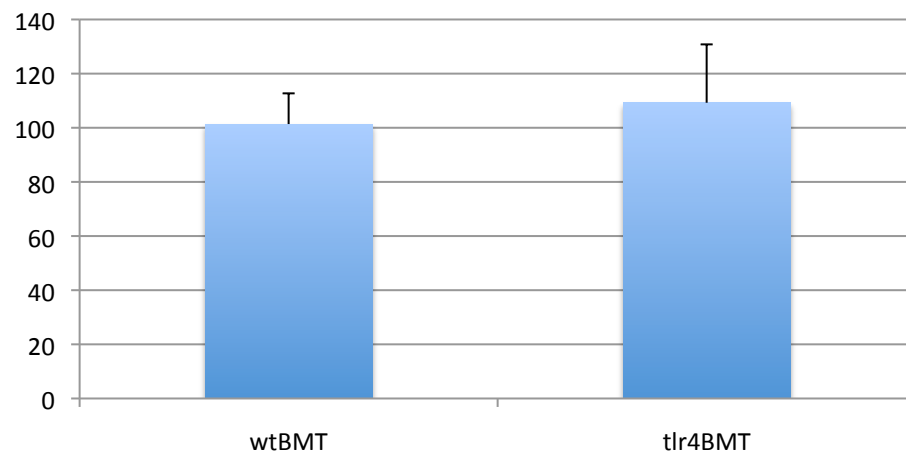

### Adipocyte volume (cubic micron)

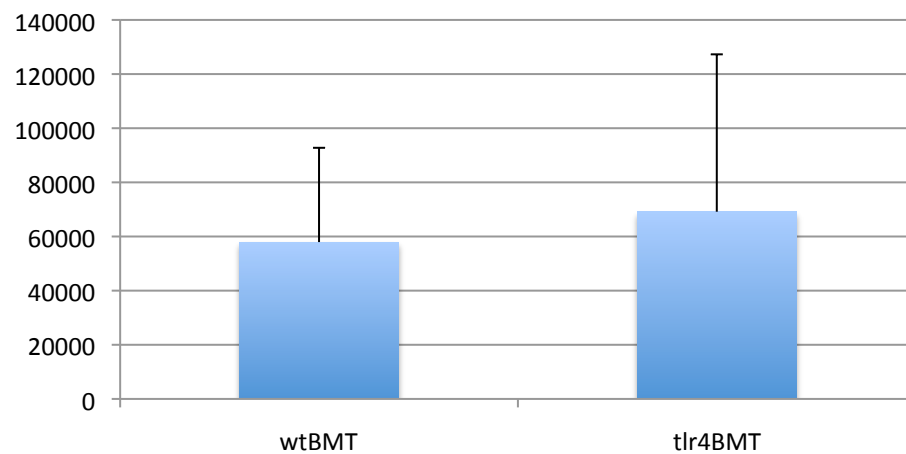

Figure S4

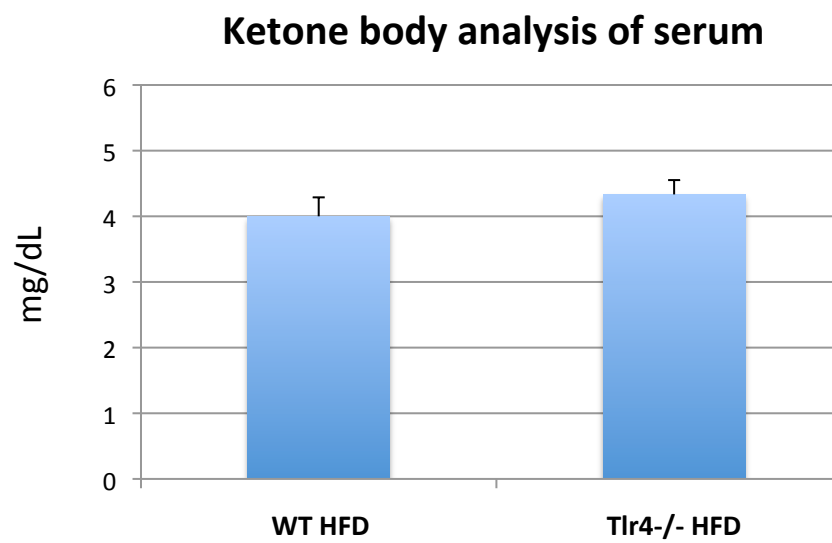

Supplement: NIHMS159434-supplement-01.pdf [file NIHMS159434-supplement-01.pdf]
